# Supplementary material
Source: PubMed Central journal article supplement (PMC8594452)
Supplement: NIHMS1742961-supplement-Supplemental_Material.pdf [file NIHMS1742961-supplement-Supplemental_Material.pdf]

## SUPPLEMENTARY MATERIALS FOR:

### **Enhanced Solid Tumor Recognition and Persistent Anti-tumor Activity with SynNotch CAR Circuits**

Axel Hyrenius-Wittsten, Yang Su, Minhee Park, Julie M. Garcia, Josef Alavi, Nathaniel Perry, Garrett Montgomery, Bin Liu\*, Kole T. Roybal\*

\*Correspondence: [kole.roybal@ucsf.edu](mailto:kole.roybal@ucsf.edu) (KT Roybal), [bin.liu@ucsf.edu](mailto:bin.liu@ucsf.edu) (B Liu)

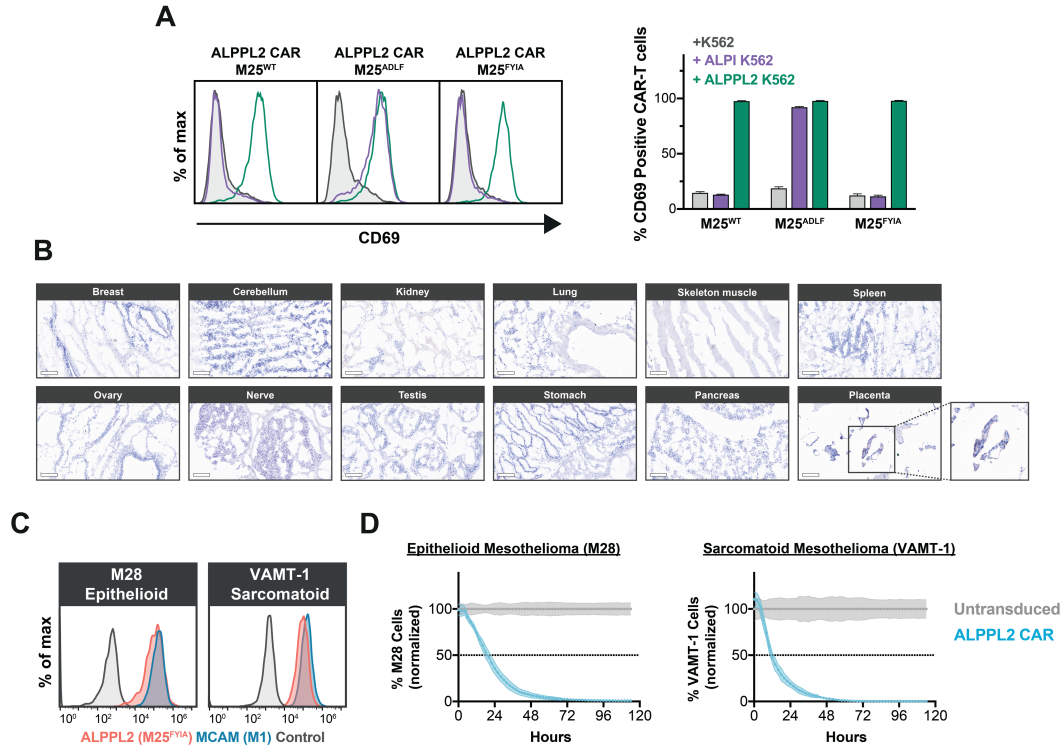

**Fig S1. Characterization of ALPPL2 tissue expression and ALPPL2 CAR specificity. (A)** Expression of the early activation marker CD69 in CD8<sup>+</sup> CAR-T cells expressing a BB $\zeta$  CAR with either a M25<sup>WT</sup>, M25<sup>ADLF</sup>, or M25<sup>FYIA</sup> scFv 24 hours after stimulation with K562 leukemia cells expressing either ALPI or ALPPL2 (n=3 for all groups, data from one experiment). **(B)** Immunohistochemistry (IHC) of ALPPL2 expression in normal human frozen tissues using the M25<sup>FYIA</sup> scFv. Binding was only observed in placental trophoblasts. Scale bar: 100 $\mu$ m (representative from two independent experiments). **(C)** Cell surface co-expression of ALPPL2 and MCAM in an epithelioid mesothelioma cell line M28 and a sarcomatoid cell line VAMT-1 using M1 and M25<sup>FYIA</sup> scFvs (representative from three independent experiments). **(D)** Killing kinetics of epithelioid (M28) and sarcomatoid (VAMT-1) mesothelioma tumor cells by CD8<sup>+</sup> T cells expressing an ALPPL2 CAR (M25<sup>FYIA</sup>) (n=3 for both groups, representative of at least two independent experiments). CAR, chimeric antigen receptor.

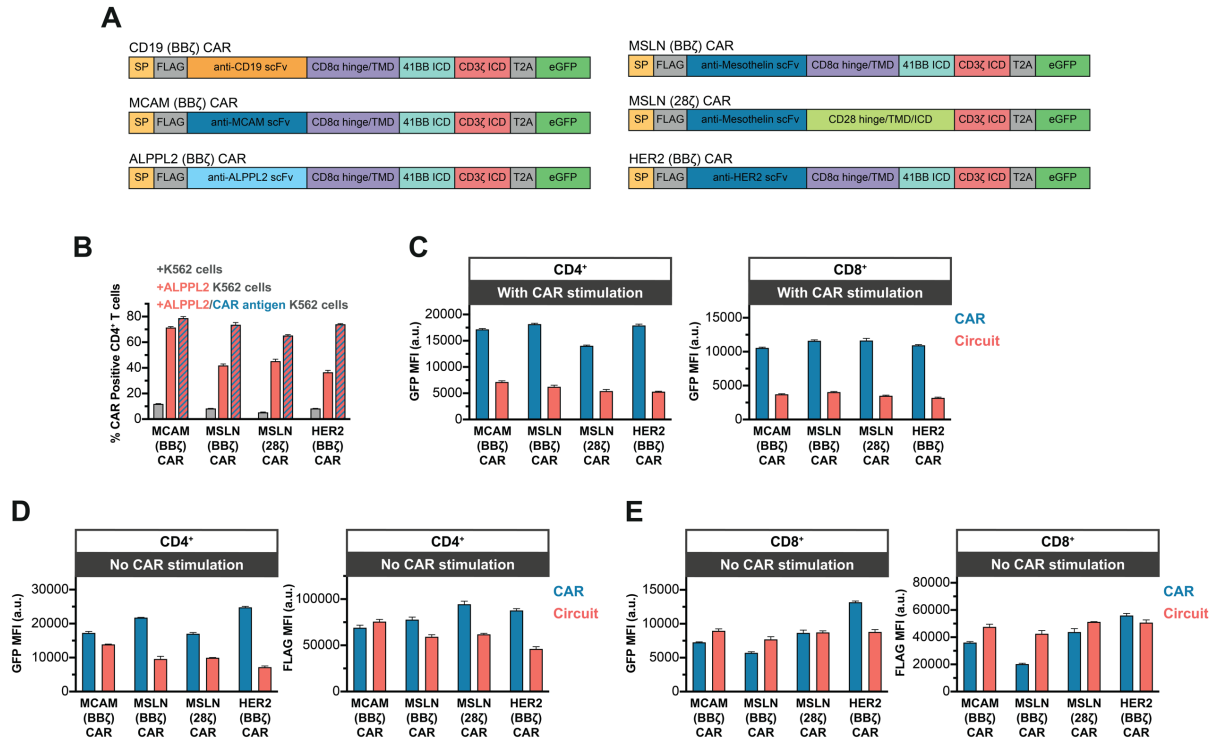

**Fig. S2. Characterization of ALPPL2 synNotch-regulated CAR expression.** (A) Design of CD19, MCAM, ALPPL2, Mesothelin (MSLN), and HER2 CARs included in the study. SP, signaling peptide; FLAG, FLAG-tag; ICD, intracellular domain; TMD, transmembrane domain. (B) Antigen-specific CAR expression in CD4<sup>+</sup> T cells was determined by green fluorescent protein (GFP) expression after 48 hours of stimulation with K562 cells expressing MCAM, mesothelin, and HER2 ± ALPPL2 (representative of two independent experiments). (C) CAR expression in CD4<sup>+</sup> or CD8<sup>+</sup> T cells engineered to express MCAM (BBζ) CAR, Mesothelin (MSLN, BBζ or 28ζ) CAR, or HER2 (BBζ) CAR constitutively or under ALPPL2 synNotch transcriptional regulation 48 hours post-stimulation with K562 target cells expressing ALPPL2, MCAM, mesothelin, and HER2, as determined by GFP mean fluorescence intensity (MFI). (D,E) CAR expression in CD4<sup>+</sup> (D) or CD8<sup>+</sup> (E) T cells engineered to express MCAM (BBζ) CAR, MSLN (BBζ or 28ζ) CAR, or HER2 (BBζ) CAR constitutively or under ALPPL2 synNotch transcriptional regulation 48 hours post-stimulation with K562 target cells expressing solely ALPPL2, as determined by GFP expression

and FLAG-tag surface staining by MFI. (**B-E**; n=3 for all groups, representative of two independent experiments) Data are shown as mean±SD.



**A****T cell Activation at 48 hrs.**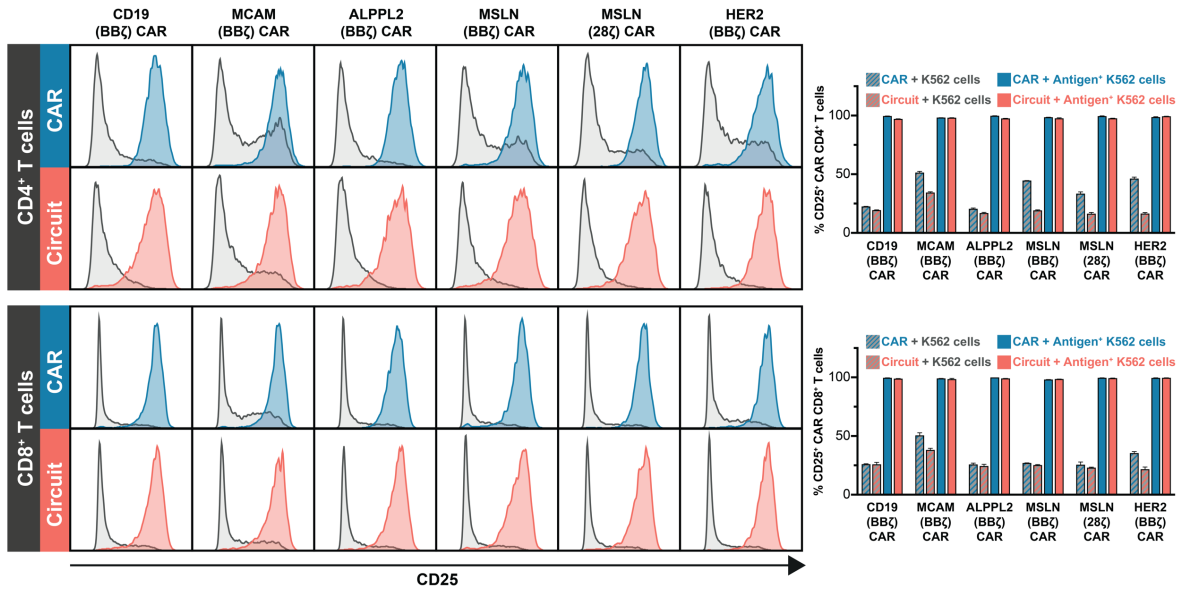**B****T cell Proliferation at 72 hrs.**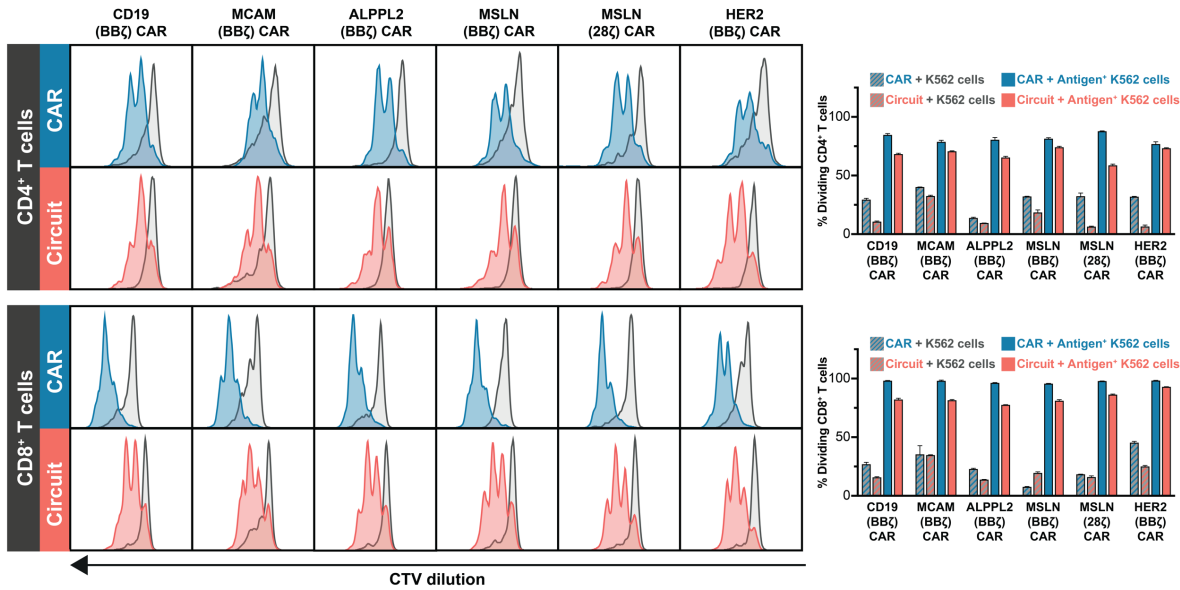**Fig. S3. Activation and proliferation of antigen-stimulated ALPPL2 synNotch CAR circuits.**

(A) CD4<sup>+</sup> or CD8<sup>+</sup> T cells were engineered to express an ALPPL2 synNotch together with a genetic circuit encoding for either a CD19 (BB $\zeta$ ), MCAM (BB $\zeta$ ), ALPPL2 (BB $\zeta$ ), mesothelin (MSLN, BB $\zeta$  or 28 $\zeta$ ), or HER2 (BB $\zeta$ ) CAR and were analyzed for CD25 expression in CAR positive cells after 48 hours of stimulation with K562 cells  $\pm$  cognate antigens (n=3 for all groups,

representative of two independent experiments). **(B)** Proliferation of cell trace violet (CTV)-labelled CD4<sup>+</sup> or CD8<sup>+</sup> T cells expressing ALPPL2 synNotch CAR circuits three days after stimulation with K562 cells  $\pm$  cognate antigens (n=3 for all groups, representative of two independent experiments). Data are shown as mean $\pm$ SD. For flow histograms, y-axis shows % of max.

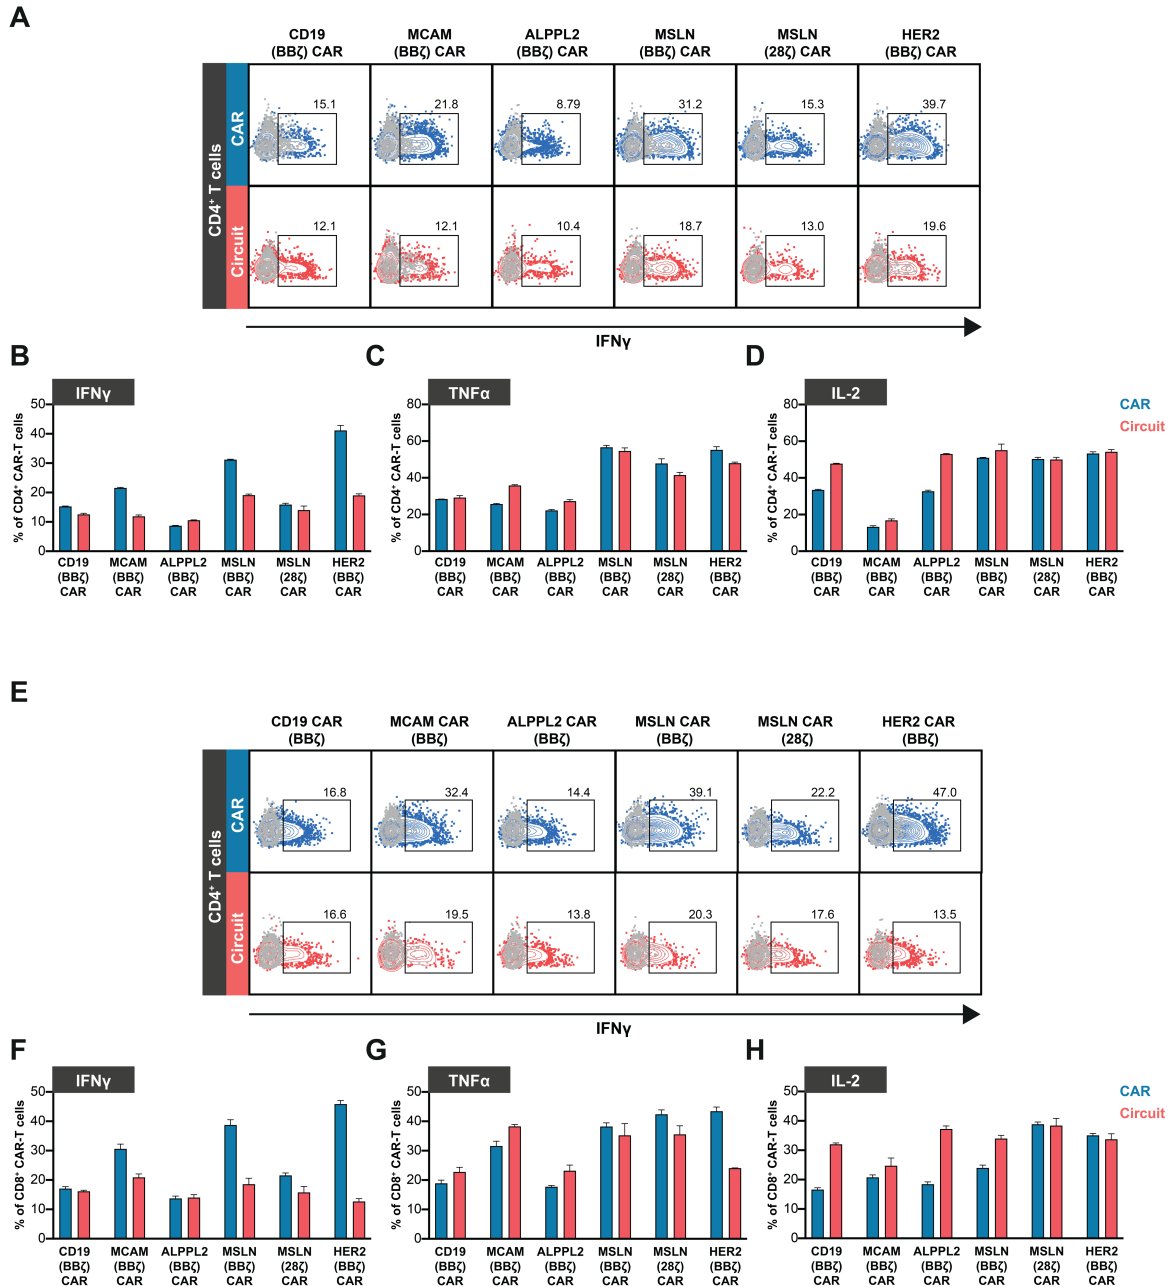

**Fig. S4. Cytokine production by CAR and synNotch CAR circuit T cells.** (A) Contour plots showing interferon gamma (IFN $\gamma$ ) production in CD4<sup>+</sup> T cells engineered to express a CD19 (BBζ), MCAM (BBζ), ALPPL2 (BBζ), mesothelin (MSLN, BBζ or 28ζ), or HER2 (BBζ) CAR constitutively or through ALPPL2-synNotch CAR circuits after stimulation with K562 cells  $\pm$  cognate antigens. SynNotch CAR circuits were primed to express the CAR prior to antigen stimulation using myc-beads to allow for instant CAR stimulation. (B-D) Summarized cytokine production in CD4<sup>+</sup> T cells

for interferon gamma (IFN $\gamma$ , **B**), tumor necrosis factor alpha (TNF $\alpha$ , **C**), or interleukin (IL)-2 (**D**) after 6 hours of CAR antigen stimulation (n=3 for all groups, data from one experiment). (**E**) Contour plots showing IFN $\gamma$  production in CD8<sup>+</sup> T cells engineered to express a CD19 (BB $\zeta$ ), MCAM (BB $\zeta$ ), ALPPL2 (BB $\zeta$ ), MSLN (BB $\zeta$  or 28 $\zeta$ ), or HER2 (BB $\zeta$ ) CAR constitutively or through ALPPL2-synNotch CAR circuits after stimulation with K562 cells  $\pm$  cognate antigens. CAR circuits were primed to express the CAR prior to antigen stimulation using myc-beads. (**F-H**) Summarized cytokine production in CD8<sup>+</sup> T cells for IFN $\gamma$  (**F**), TNF $\alpha$  (**G**), and IL-2 (**H**) after 6 hours of CAR antigen stimulation (n=3 for all groups, data from one experiment). Data are shown as mean $\pm$ SD.

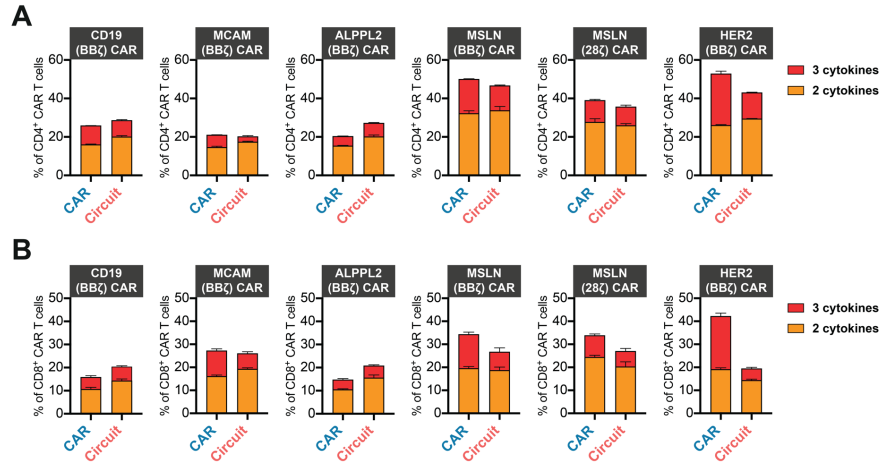

**Fig. S5. Polyfunctionality of CAR and synNotch CAR circuit T cells. (A and B)** CD4<sup>+</sup> (A) or CD8<sup>+</sup> (B) T cells engineered to express a CD19 (BB $\zeta$ ), MCAM (BB $\zeta$ ), ALPPL2 (BB $\zeta$ ), mesothelin (MSLN, BB $\zeta$  or 28 $\zeta$ ), or HER2 (BB $\zeta$ ) CAR constitutively or through ALPPL2-synNotch CAR circuits were stimulated with K562 cells expressing the cognate CAR antigen and ALPPL2. All T cells were cultured in the presence myc-beads for 24 hours prior to the assay in order to prime SynNotch CAR circuits to express the CAR prior to antigen stimulation for instant CAR activation for all groups. Polyfunctional CD4<sup>+</sup> or CD8<sup>+</sup> T cells were determined by simultaneous expression of two or three of cytokines measured (IFN $\gamma$ , TNF $\alpha$ , or IL-2) after 6 hours of CAR antigen stimulation (n=3 for all groups, data from one experiment). Data are shown as mean $\pm$ SD.

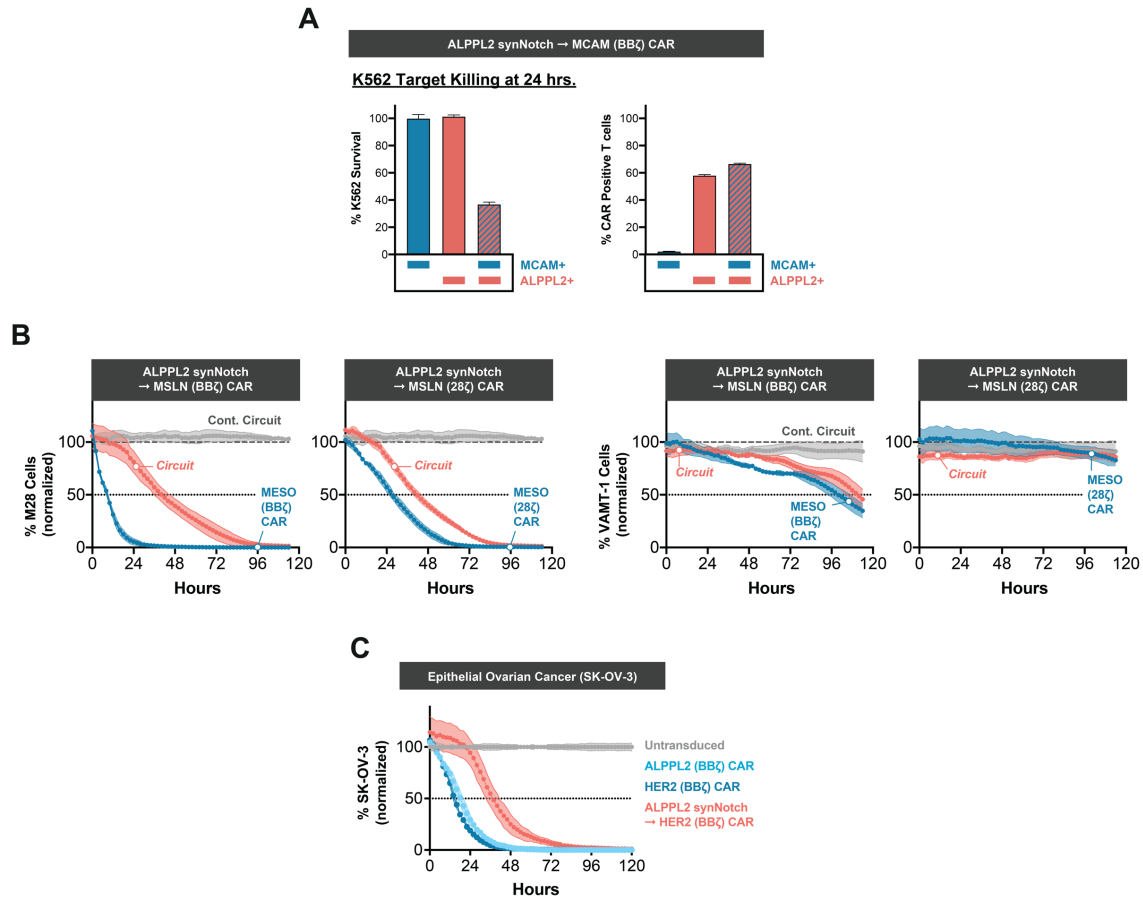

**Fig. S6. SynNotch CAR circuit T cells exhibit multi-antigen specificity and paced tumor elimination.** (A) Target killing of K562 cells expressing MCAM, ALPPL2, or the combination of the two by CD8<sup>+</sup> T cells expressing an ALPPL2 synNotch MCAM (BBζ) CAR circuit after 24 hours of co-culture. Percentage CAR positive T cells was determined by GFP expression (n=3 for all groups, representative of at least two independent experiments). (B) Incucyte assay showing killing kinetics of epithelioid (M28) and sarcomatoid (VAMT-1) mesothelioma tumor cells by CD8<sup>+</sup> T cells expressing a BBζ mesothelin (MSLN) or 28ζ MSLN CAR constitutively or through an ALPPL2-synNotch (n=3 for all groups, representative of two independent experiments). (C) Incucyte assay showing killing kinetics of ALPPL2<sup>+</sup> SK-OV-3 ovarian tumor cells by CD8<sup>+</sup> T cells expressing an ALPPL2 (BBζ) CAR or a HER2 (BBζ) CAR constitutively or HER2 (BBζ) CAR through an ALPPL2-synNotch CAR circuit (n=3 for all groups, data from one experiment). Data are shown as mean±SD.

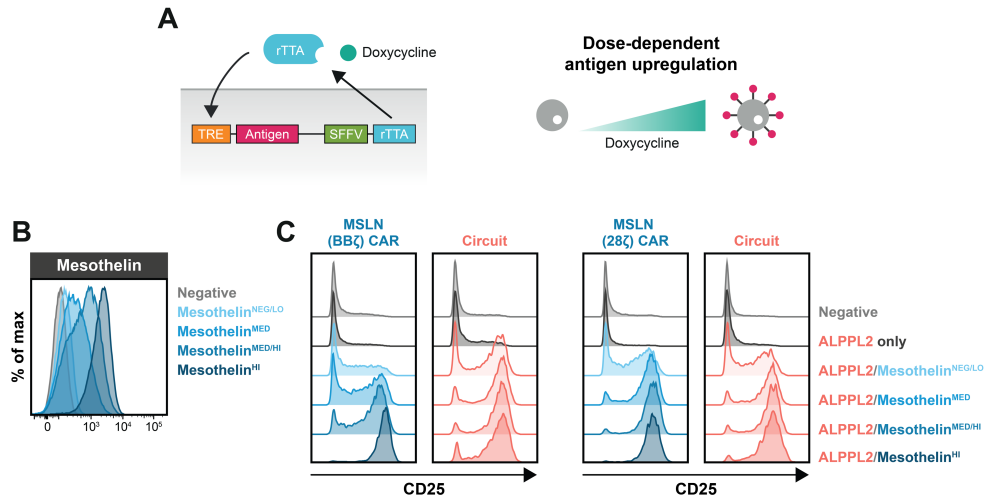

**Fig. S7. Development of tumor cell lines expressing titratable antigen densities and synNotch CAR circuit sensitivity toward mesothelin.** (A) Genetic circuit for doxycycline inducible ligand surface expression. TRE, tetracycline response element; rTTA, reverse tetracycline-controlled transactivator. (B) ALPPL2<sup>+</sup> K562 cells were constructed to display dose-dependent expression of mesothelin upon treatment with doxycycline. Mesothelin<sup>HI</sup> cells express mesothelin driven by the spleen focus-forming virus (SFFV) promoter. (C) CD8<sup>+</sup> T cells engineered with a mesothelin (MSLN, BB $\zeta$  or 28 $\zeta$ ) CAR either under a constitutive SFFV promoter or ALPPL2 synNotch circuit were challenged with doxycycline-treated K562 target cells and assessed for CD25 expression after 48 hours (data from one experiment). For flow histograms, y-axis shows % of max.

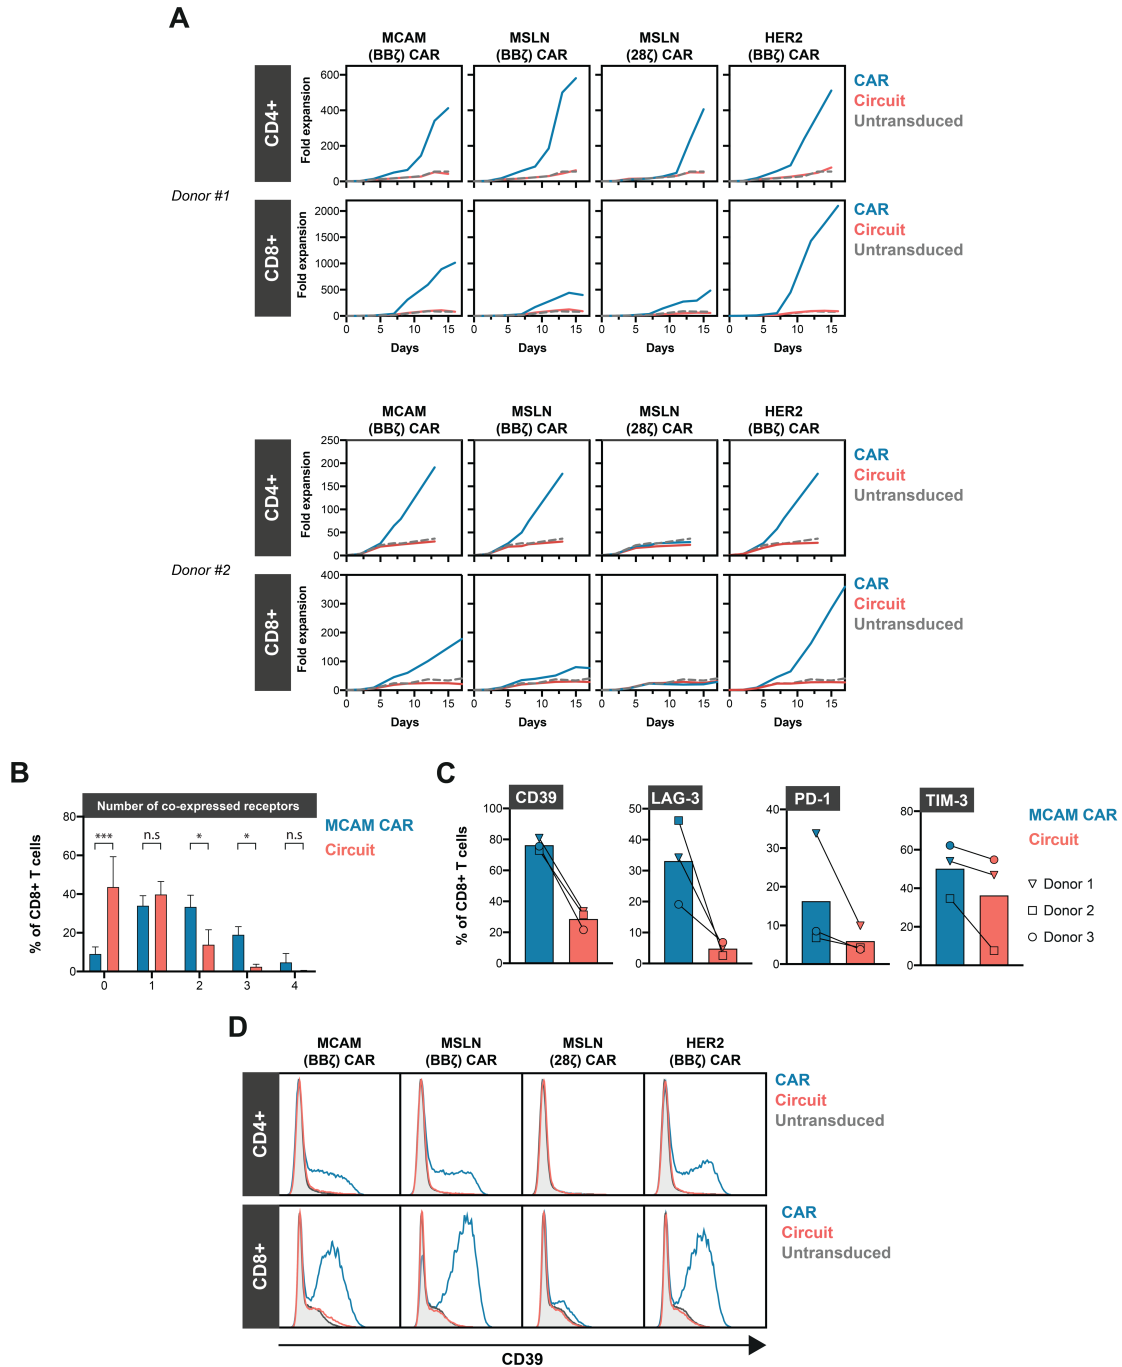

**Fig. S8. Phenotypic analysis of CAR and synNotch CAR T cells prior to antigen exposure.**

(A) Expansion of engineered CD4<sup>+</sup> or CD8<sup>+</sup> T cells after removal of CD3/CD28 Dynabead stimulation in two separate donors. (B) Co-expression pattern and (C) fraction of cells positive for CD39, lymphocyte-activation gene 3 (Lag-3), programmed cell death protein 1 (PD-1), or T-cell immunoglobulin and mucin-domain containing-3 (Tim-3) in non-antigen exposed CD8<sup>+</sup> T cells



from three different donors engineered to express a MCAM (BB $\zeta$ ) CAR either constitutively or through ALPPL2 synNotch circuit 14 days post initial CD3/CD28 Dynabead stimulation. (D) Expression of CD39 in CD4<sup>+</sup> or CD8<sup>+</sup> T cells engineered to express a MCAM (BB $\zeta$ ), mesothelin (MSLN, BB $\zeta$  or 28 $\zeta$ ), or HER2 (BB $\zeta$ ) CAR either constitutively or through ALPPL2 synNotch circuit 14 days post initial CD3/CD28 Dynabead stimulation (representative of two independent experiments). Statistics were calculated using a two-way ANOVA with Šidák's post-hoc test. Data is shown as mean $\pm$ SD. For flow histograms, y-axis shows % of max. \*P  $\leq$  0.05; \*\*\*P  $\leq$  0.001; n.s.; not significant.

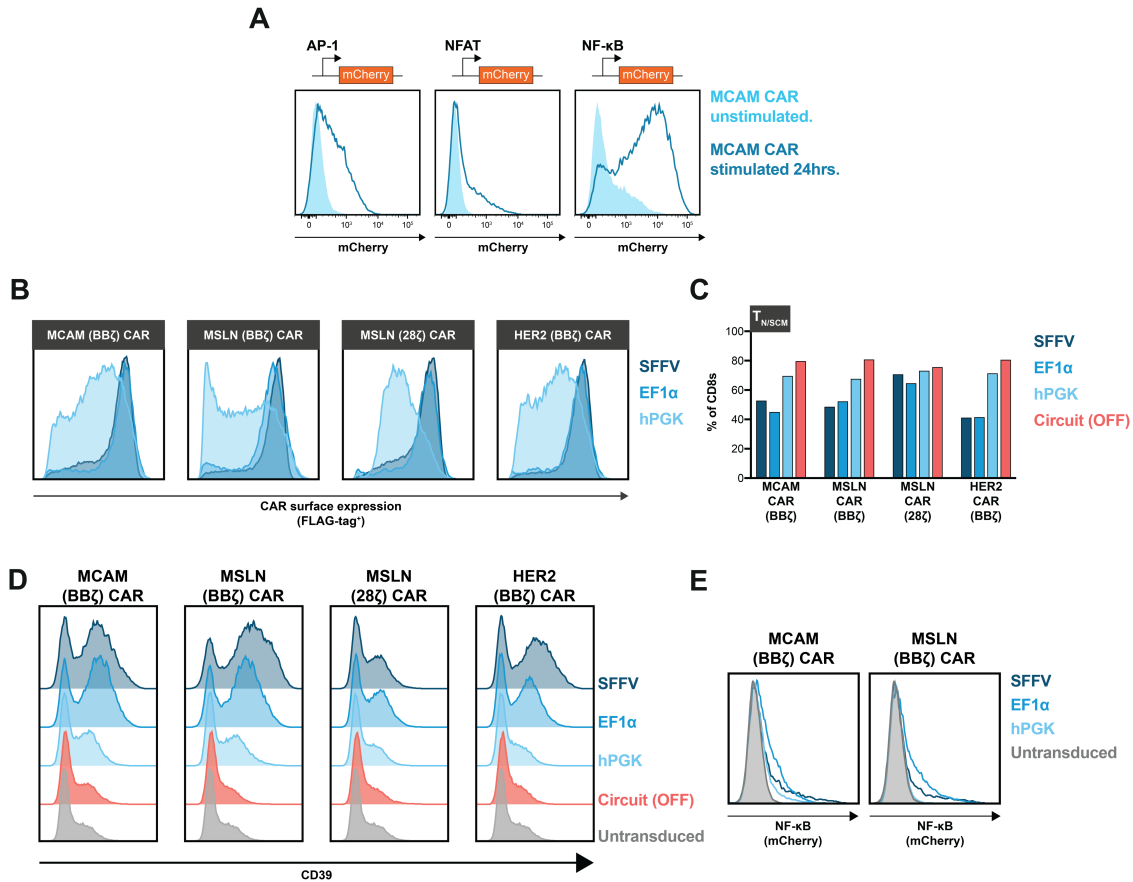

**Fig. S9. Impact of CAR expression on tonic signaling.** (A) Activator protein 1 (AP-1), nuclear factor of activated T cells (NFAT), or nuclear factor kappa B (NF- $\kappa$ B) response element activity in Jurkat cells constitutively expressing a MCAM (BB $\zeta$ ) CAR 24 hours after stimulation with MCAM positive K562 cells (data from one experiment). (B) Expression of MCAM (BB $\zeta$ ), mesothelin (MSLN, BB $\zeta$  or 28 $\zeta$ ), or HER2 (BB $\zeta$ ) CAR driven by either a SFFV, elongation factor 1-alpha (EF1 $\alpha$ ), or human phosphoglycerate kinase (hPGK) promoter in CD8<sup>+</sup> T cells after removal of CD3/CD28 Dynabead stimulation as determined by surface FLAG-tag expression (data from one experiment). (C) Fraction of CD8<sup>+</sup> displaying a T<sub>N/SCM</sub> (naïve/stem cell memory-like, CD45RA<sup>+</sup>CD62L<sup>+</sup>) phenotype and (D) CD39 expression when expressing an MCAM (BB $\zeta$ ), MSLN (BB $\zeta$  or 28 $\zeta$ ), or HER2 (BB $\zeta$ ) CAR by either a SFFV, EF1 $\alpha$ , or hPGK promoter (data from one experiment). (E) NF- $\kappa$ B response element regulated mCherry expression in Jurkat cells carrying

an MCAM (BBζ) or MSLN (BBζ) CAR driven by either a SFFV, EF1α, or hPGK promoter (data from one experiment). For flow histograms, y-axis shows % of max.

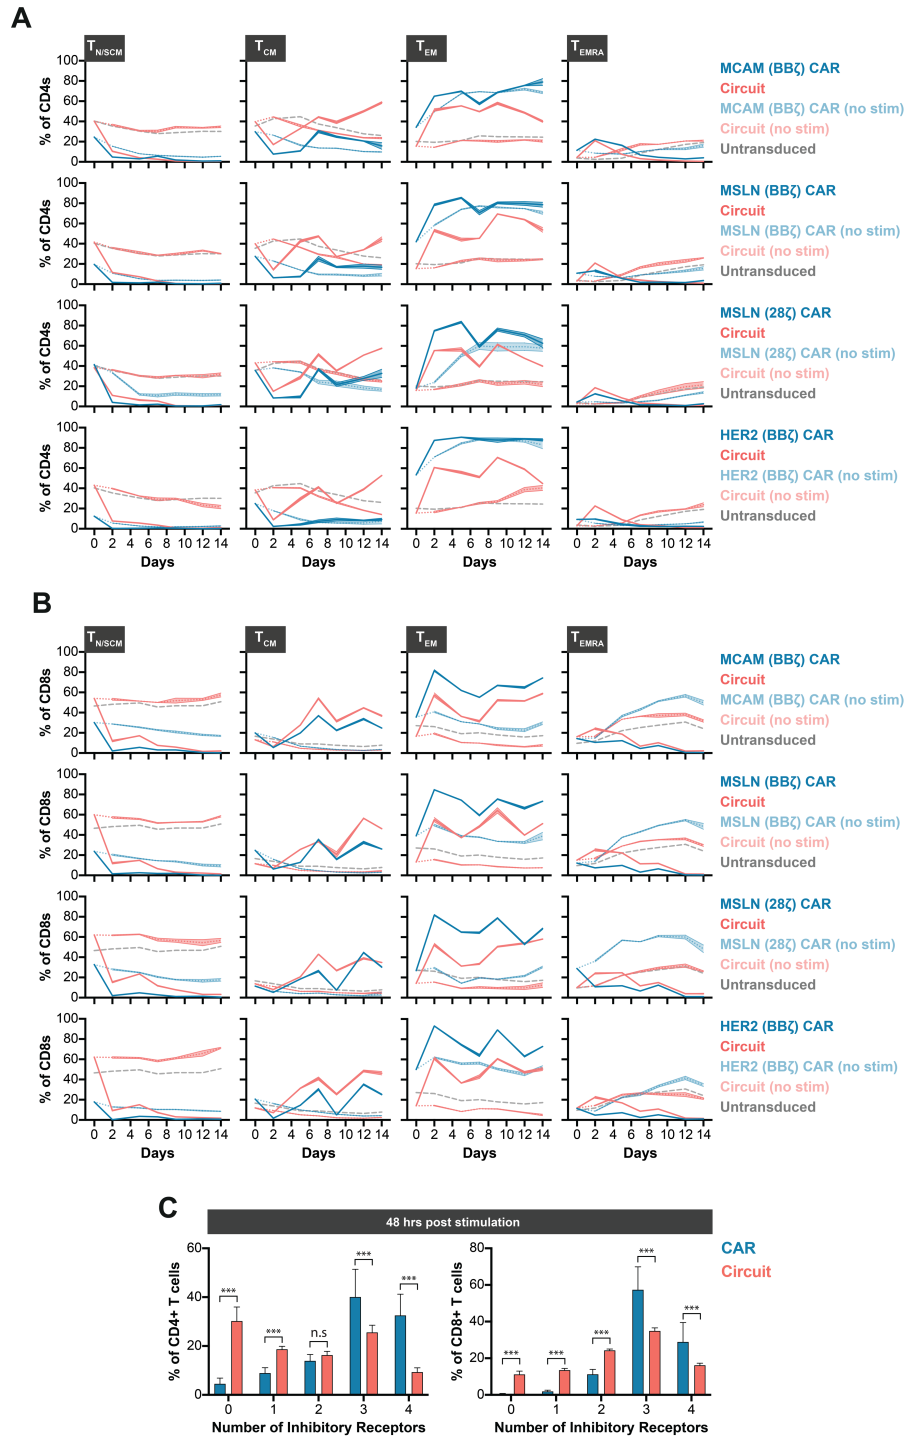

**Fig. S10. SynNotch CAR circuits regulate the evolution of T cell differentiation pre and post antigen stimulation. (A, B)** Phenotypic evolution for engineered CD4<sup>+</sup> (A) or CD8<sup>+</sup> (B) T cells expressing MCAM (BB $\zeta$ ), mesothelin (MSLN, BB $\zeta$  or 28 $\zeta$ ), or HER2 (BB $\zeta$ ) CAR constitutively or through an ALPPL2-synNotch circuit upon culture without or after two stimulations of ALPPL2<sup>+</sup>

K562 cells expressing the cognate CAR antigens (data from one experiment). **(C)** Co-expressional pattern of CD39, Lag-3, PD-1, and Tim-3 in CD4<sup>+</sup> or CD8<sup>+</sup> T cells engineered to express a MCAM (BB $\zeta$ ), MSLN (BB $\zeta$  or 28 $\zeta$ ), or HER2 (BB $\zeta$ ) CAR constitutively or through an ALPPL2-synNotch circuit 48 hours after stimulation with ALPPL2<sup>+</sup> K562 cells expressing the cognate CAR antigens (n=12 for both groups, data from one experiment). Data is presented as mean $\pm$ SEM (**A,B**) or mean $\pm$ SD (**C**) and statistics were calculated using two-way ANOVA with Šidák's post-hoc test. \*\*\*P  $\leq$  0.001; n.s.; not significant. T<sub>CM</sub>, central memory-like T cells (CD45RA<sup>-</sup>CD62L<sup>+</sup>); T<sub>EM</sub>, effector memory-like T cells (CD45RA<sup>-</sup>CD62L<sup>-</sup>); T<sub>EMRA</sub>, effector memory-like T cells re-expressing CD45RA (CD45RA<sup>+</sup>CD62L<sup>-</sup>).

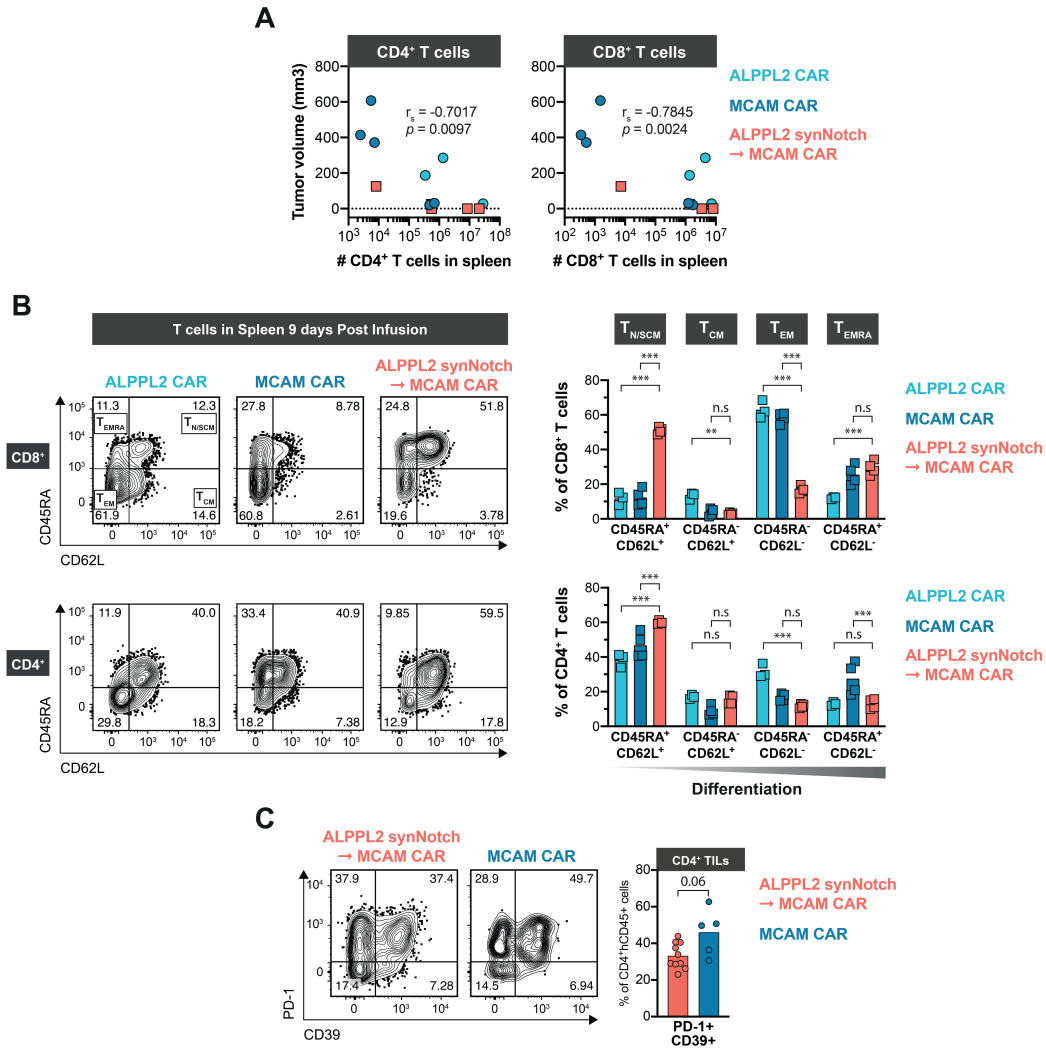

**Fig. S11. Persistence of CAR T cells and synNotch CAR circuit T cells in treated M28 tumor-bearing mice. (A)** Correlation between final tumor volume and number of human CD4<sup>+</sup> or CD8<sup>+</sup> T cells in the spleen at the end of the experiment. Correlation was determined using Spearman's rank correlation coefficient (data from one experiment). **(B)** Percentage of T cell memory subsets in human CD8<sup>+</sup> and CD4<sup>+</sup> T cells in the spleen of M28 tumor-bearing NOD.Cg-*Prkdc<sup>scid</sup>Il2rg<sup>tm1Wjl</sup>/SzJ* (NSG) mice 9 days after T cell infusion (data from one experiment). **(C)** Expression of PD-1 and CD39 in CD4<sup>+</sup> tumor-infiltrating lymphocytes (TILs) expressing a MCAM (BB $\zeta$ ) CAR either constitutively or through an ALPPL2 synNotch (representative of two

independent experiments). Statistics were calculated using two-way ANOVA with Tukey's post-hoc test (**B**) or Mann-Whitney U test (**C**). \*\* $P \leq 0.01$ ; \*\*\* $P \leq 0.001$ ; n.s.; not significant.

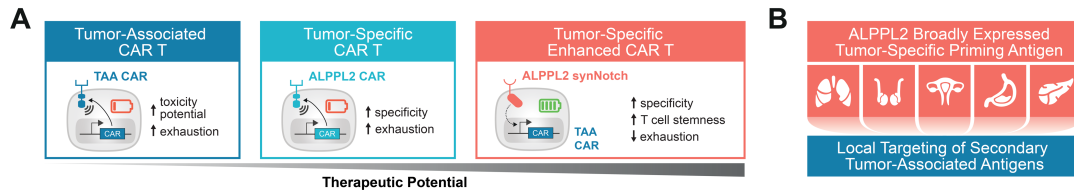

**Fig. S12 SynNotch enhancements for CAR T therapy.** (A) SynNotch CAR circuits allow for safe targeting of tumor-associated antigens and enhances immunotherapeutic potential by avoiding tonic CAR signaling outside tumor tissues. TAA, Tumor-associated antigen. (B) ALPPL2 is a highly tumor-specific antigen expressed in mesothelioma, seminoma, gastric-, ovarian-, and pancreatic cancer that allows for safe targeting of other less specific tumor-associated antigens.



**Table S1. ALPPL2 expression in solid tumors.** IHC was performed on formalin-fixed paraffin-embedded (FFPE) tumor tissues using a mouse monoclonal antibody (mAb, LifeSpan clone SPM593, catalogue# LS-C390148-20). The number and percentage of ALPPL2 positive cases are indicated. ALPPL2 is expressed in all seminoma cases studied and the expression appears to be uniformly high. For other tumors studied, a fraction of the cases showed ALPPL2 expression. For those cases, graded ALPPL2 expression is seen for individual specimens. Within the same specimen, expression variation exists to a limited extent (less than 50%) for mesothelioma, ovarian cancer, and gastric cancer. Greater intra-specimen variation is observed for pancreatic cancer compared with other tumors studied. For reference, we also analyzed a public protein expression database, the Human Protein Atlas (<https://www.proteinatlas.org>), and listed the result of ALPPL2 expression by IHC using the validated rabbit polyclonal antibody (pAb, MilliporeSigma HPA038764). NA, not available.

| <b>Tumor Category</b> | <b>This study</b> | <b>Protein Atlas</b> |
|-----------------------|-------------------|----------------------|
| Mesothelioma          | 39/91 (42.86%)    | N/A                  |
| Ovarian cancer        | 36/60 (60%)       | 7/12 (58.33%)        |
| Pancreatic cancer     | 18/50 (36%)       | 2/10 (20%)           |
| Gastric cancer        | 13/72 (18.06%)    | 3/11 (27.27%)        |
| Seminoma              | 11/11(100%)       | 9/11 (81.82%)        |

**Table S2. Tissue specificity of ALPPL2 expression.** The biotin-labeled M25<sup>FYIA</sup> scFv and a biotin-labeled non-binding scFv (control) were used to stain normal human frozen tissue arrays. Each tissue type has duplicated cores on the array. Staining results of the M25<sup>FYIA</sup> scFv were compared with that of the control scFv to determine positive or negative staining. Other than placenta (which expresses ALPPL2), all other normal tissues showed uniformly negative staining. N: negative staining.

| Organ           | Core 1   | Core 2   |
|-----------------|----------|----------|
| Salivary        | N        | N        |
| Esophagus       | N        | N        |
| Rectum          | N        | N        |
| Stomach         | N        | N        |
| Kidney          | N        | N        |
| Skeletal muscle | N        | N        |
| Skin            | N        | N        |
| Testis          | N        | N        |
| Placenta        | Positive | Positive |
| Breast          | N        | N        |
| Cervix          | N        | N        |
| Uterus          | N        | N        |
| Spleen          | N        | N        |
| Lung            | N        | N        |
| Cerebellum      | N        | N        |
| Nerve           | N        | N        |
| Thyroid gland   | N        | N        |
| Pancreas        | N        | N        |
| Ovary           | N        | N        |
| Prostate        | N        | N        |

**Table S3. IHC of MCAM expression in FFPE mesothelioma tissue arrays.** The number and percentage of each type of staining patterns are indicated. MCAM was detected by both mAb (Abcam clone EPR3208, catalogue# ab75769) and pAb (Abcam, catalogue# ab228487). The difference in percentage between mAb and pAb may reflect difference in sensitivity of antigen/epitope detection in FFPE tissues.

| <b>Staining Result</b>     | <b>Anti-MCAM<br/>(Rabbit mAb)</b> | <b>Anti-MCAM<br/>(Rabbit pAb)</b> |
|----------------------------|-----------------------------------|-----------------------------------|
| Positive                   | 31 (38.27%)                       | 73 (75.26%)                       |
| Negative                   | 50 (61.73%)                       | 24 (24.74%)                       |
| Total tissue cores studied | 81                                | 97                                |

**Table S4. MCAM co-expression in ALPPL2 positive mesothelioma.** IHC was performed on FFPE tumor tissue arrays using anti-ALPPL2 mouse mAb (LifeSpan clone SPM593) and anti-MCAM rabbit mAb (Abcam clone EPR3208) or pAb (Abcam). Antibody pair 1: Anti-ALPPL2 mouse mAb + Anti-MCAM rabbit mAb. Antibody pair 2: Anti-ALPPL2 mouse mAb + Anti-MCAM rabbit pAb. The number and percentage of each type of staining patterns are indicated.

| <b>Staining Result</b>                     | <b>Antibody pair 1</b> | <b>Antibody pair 2</b> |
|--------------------------------------------|------------------------|------------------------|
| ALPPL2 positive/MCAM positive              | 46 (52.27%)            | 58 (80.56%)            |
| ALPPL2 positive/MCAM negative              | 42 (47.73%)            | 14 (19.44%)            |
| Total ALPPL2 positive tissue cores studied | 88                     | 72                     |

**Table S5. Antibodies used for immunophenotypic analysis.** APC, allophycocyanin; PE, phycoerythrin; FITC, fluorescein isothiocyanate; BV, brilliant violet; AF, Alexa Fluor; BUV, brilliant ultraviolet

| Antibody                                  | Source                    | Dilution | Identifier                         |
|-------------------------------------------|---------------------------|----------|------------------------------------|
| anti-CD146 APC (clone 541-10B2)           | Miltenyi Biotec           | 1:200    | Cat#: 130-097-942, RRID:AB_2660769 |
| anti-CD146 PE (clone P1H12)               | BioLegend                 | 1:200    | Cat#: 361005, RRID:AB_2562980      |
| anti-CD19 FITC (clone HIB19)              | eBioscience               | 1:200    | Cat#: 11-0199-41, RRID:AB_10668005 |
| anti-CD197 PE/Cy7 (clone G043H7)          | BioLegend                 | 1:200    | Cat#: 353226, RRID:AB_11126145     |
| anti-CD223 BV785 (clone 11C3C65)          | BioLegend                 | 1:200    | Cat#: 369322, RRID:AB_2716127      |
| anti-CD27 APC/Cy7 (clone M-T271)          | BioLegend                 | 1:200    | Cat#: 356424, RRID:AB_2566773      |
| anti-CD279 PE (clone EH12.2H7)            | BioLegend                 | 1:200    | Cat#: 329906, RRID:AB_940483       |
| anti-CD279 APC (clone EH12.2H7)           | BioLegend                 | 1:200    | Cat#: 329908, RRID:AB_940475       |
| anti-CD279 BV421 (clone EH12.2H7)         | BioLegend                 | 1:200    | Cat#: 329920, RRID:AB_10960742     |
| anti-CD3 BV711 (clone UCHT1)              | BioLegend                 | 1:200    | Cat#: 300463, RRID:AB_2566035      |
| anti-CD340 AF647 (clone 24D2)             | BioLegend                 | 1:200    | Cat#: 324412, RRID:AB_2262300      |
| anti-CD366 PE (clone 7D3)                 | BD Biosciences            | 1:200    | Cat#: 563422, RRID:AB_2716866      |
| anti-CD366 BV421 (clone F38-2E2)          | BioLegend                 | 1:200    | Cat#: 345007, RRID:AB_10900073     |
| anti-CD366 APC/Cy7 (clone F38-2E2)        | BioLegend                 | 1:200    | Cat#: 345026, RRID:AB_2565717      |
| anti-CD39 BV711 (clone A1)                | BioLegend                 | 1:200    | Cat#: 328228, RRID:AB_2632894      |
| anti-CD4 BV650 (clone SK3)                | BD Biosciences            | 1:200    | Cat#: 563875, RRID:AB_2744425      |
| anti-CD4 PE (clone SK3)                   | BioLegend                 | 1:200    | Cat#: 344606, RRID:AB_1937246      |
| anti-CD45 APC/Cy7 (clone 2D1)             | BioLegend                 | 1:200    | Cat#: 368515, RRID:AB_2566375      |
| anti-CD45 BUV395 (clone HI30)             | BD Biosciences            | 1:200    | Cat#: 563792, RRID:AB_2869519      |
| anti-CD45RA APC (clone HI100)             | BioLegend                 | 1:200    | Cat#: 304150, RRID:AB_2564158      |
| anti-CD45RA BV711 (clone HI100)           | BioLegend                 | 1:200    | Cat#: 304138, RRID:AB_2563815      |
| anti-CD45RO BUV395 (clone UCHL1)          | BD Biosciences            | 1:200    | Cat#: 564291, RRID:AB_2744410      |
| anti-CD62L BV785 (clone DREG-56)          | BioLegend                 | 1:200    | Cat#: 304830, RRID:AB_2629555      |
| anti-CD62L PE/Cy7 (clone DREG-56)         | BioLegend                 | 1:200    | Cat#: 304822, RRID:AB_830801       |
| anti-CD69 BUV395 (clone FN50)             | BD Biosciences            | 1:200    | Cat#: 564364, RRID:AB_2738770      |
| anti-CD69 APC (clone FN50)                | BioLegend                 | 1:200    | Cat#: 310910, RRID:AB_314845       |
| anti-CD8a BUV395 (clone RPA-T8)           | BD Biosciences            | 1:200    | Cat#: 563796                       |
| anti-CD8a BV786 (clone RPA-T8)            | BD Biosciences            | 1:200    | Cat#: 563823, RRID:AB_2687487      |
| anti-CD8a PE (clone SK1)                  | BioLegend                 | 1:200    | Cat#: 344706, RRID:AB_1953244      |
| anti-CD8a APC (clone OKT8)                | eBioscience               | 1:200    | Cat#: 17-0086-42, RRID:AB_10667892 |
| anti-CD95 BV711 (clone DX2)               | BioLegend                 | 1:200    | Cat#: 305644, RRID:AB_2632623      |
| anti-FLAG (DYKDDDDK) tag PE (clone L5)    | BioLegend                 | 1:200    | Cat#: 637310, RRID:AB_2563148      |
| anti-FLAG (DYKDDDDK) tag AF647 (clone L5) | BioLegend                 | 1:200    | Cat#: 637315, RRID:AB_2716154      |
| anti-FLAG (DYKDDDDK) tag BV421 (clone L5) | BioLegend                 | 1:200    | Cat#: 637322, RRID:AB_2750061      |
| anti-HA tag PE (clone GG8-1F3.3.1)        | Miltenyi Biotec           | 1:200    | Cat#: 130-120-786, RRID:AB_2784360 |
| anti-IFN- $\gamma$ BV786 (clone 4S.B3)    | BD Biosciences            | 1:200    | Cat#: 563731, RRID:AB_2738391      |
| anti-IL-2 PE/Cy7 (clone MQ1-17H12)        | BD Biosciences            | 1:200    | Cat#: 560707, RRID:AB_1727542      |
| anti-Mesothelin APC (clone REA1057)       | Miltenyi Biotec           | 1:200    | Cat#: 130-118-096, RRID:AB_2733436 |
| anti-Myc tag AF647 (clone 9B11)           | Cell Signaling Technology | 1:200    | Cat#: 2233S, RRID:AB_823474        |
| anti-TNF BUV395 (clone MAb11)             | BD Biosciences            | 1:200    | Cat#: 563996, RRID:AB_2738533      |
